# Supplementary material
Source: HighWire-hosted journal article supplement (https://mentalhealth.bmj.com/content/25/2/47)

### Modelling YLDs/DALYs

This is a cohort-based Markov state transition model. The blue bubbles represent health states (CMD, remission or death) characterised by a unique disability weight (disability weight for death=1). The straight arrows represent transitions between states occurring with a given probability (or in this case the % of the model cohort who transition as shown); the curved arrows indicate that probability of remaining in a specific state.

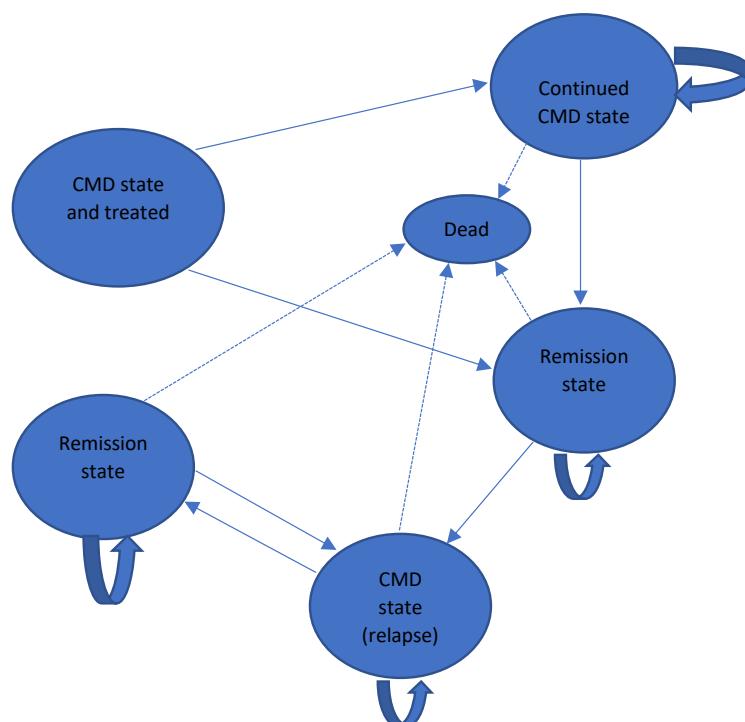

Supplement: inline-supplementary-material-1 [file inline-supplementary-material-1.pdf]
